# Supplementary material for: Use of a bioresource nanocomposite as a heterogeneous base catalyst for the green synthesis of novel bioactive pyrazoles: antibacterial evaluation using molecular docking
Source: Royal Society of Chemistry journal article supplement (doi:10.1039/d2nj05513a), 2023-01-01
Supplement: d2nj05513a1.pdf [file d2nj05513a1.pdf]

## Supplemental Material

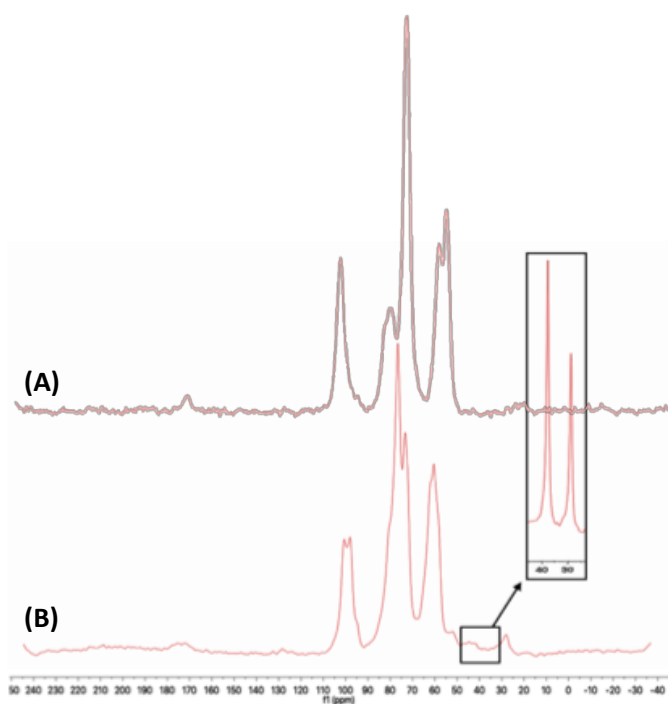

Figure S1  $^{13}\text{C}$  NMR spectrum of CS (A) and CS-DAA polymer (B).

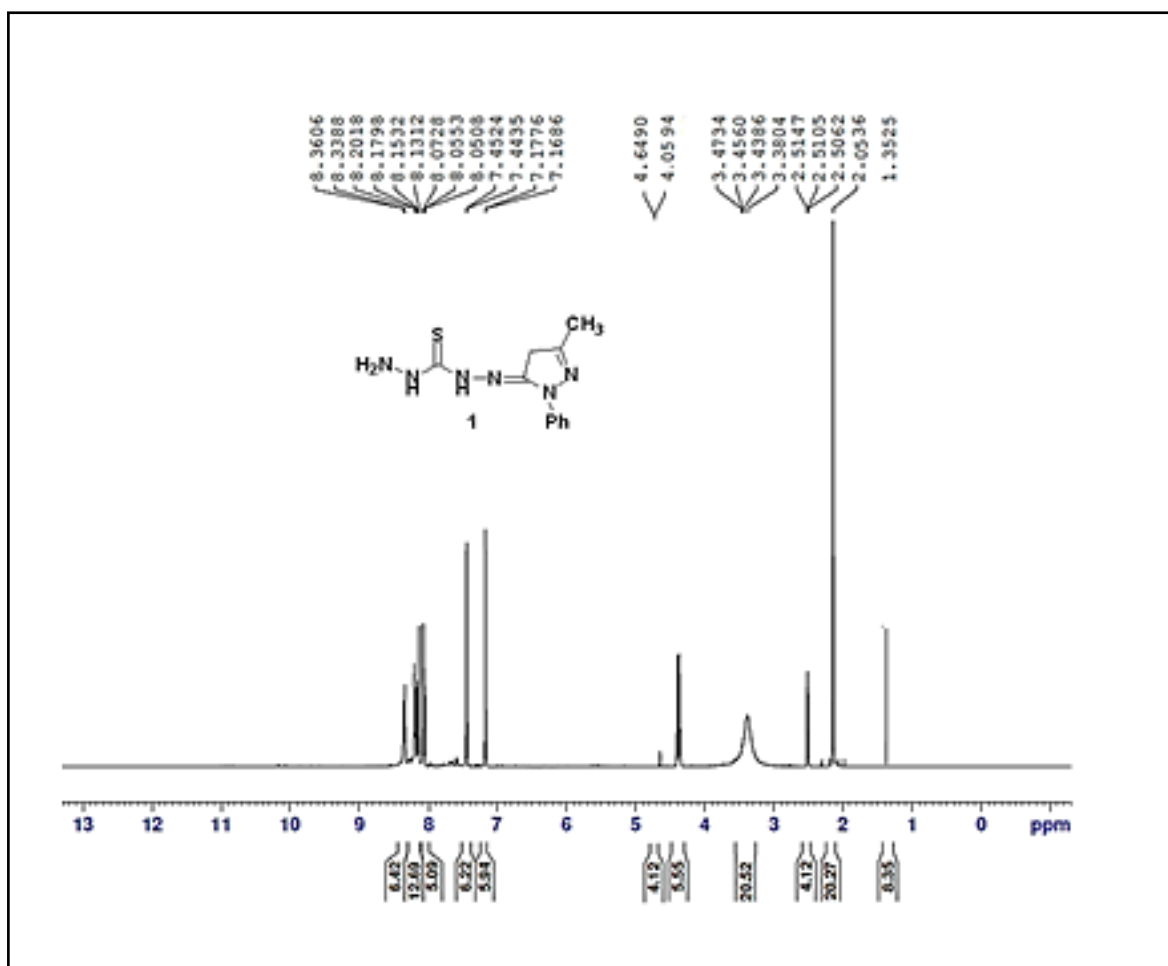

Figure S2.  $^1\text{H}$  NMR of compound (1).

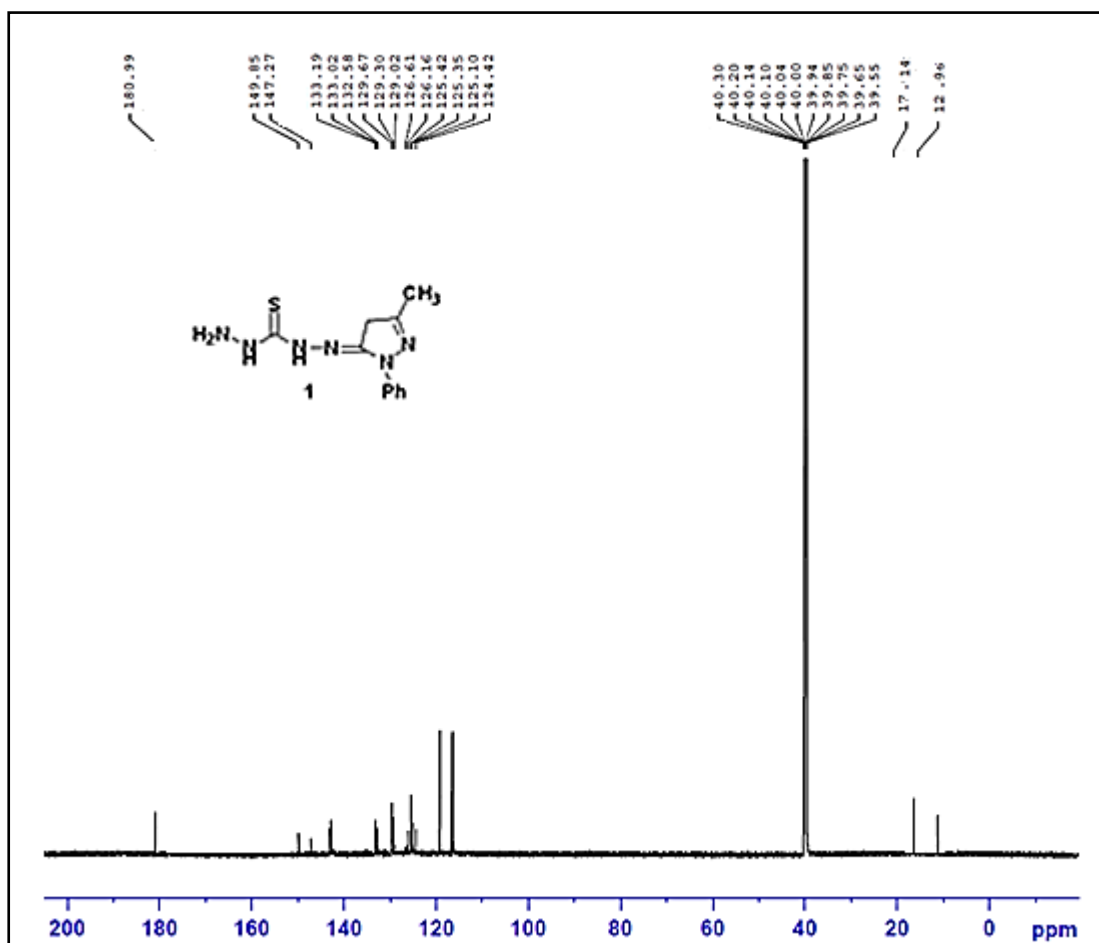

Figure S3.  $^{13}\text{C}$  NMR of compound (1).

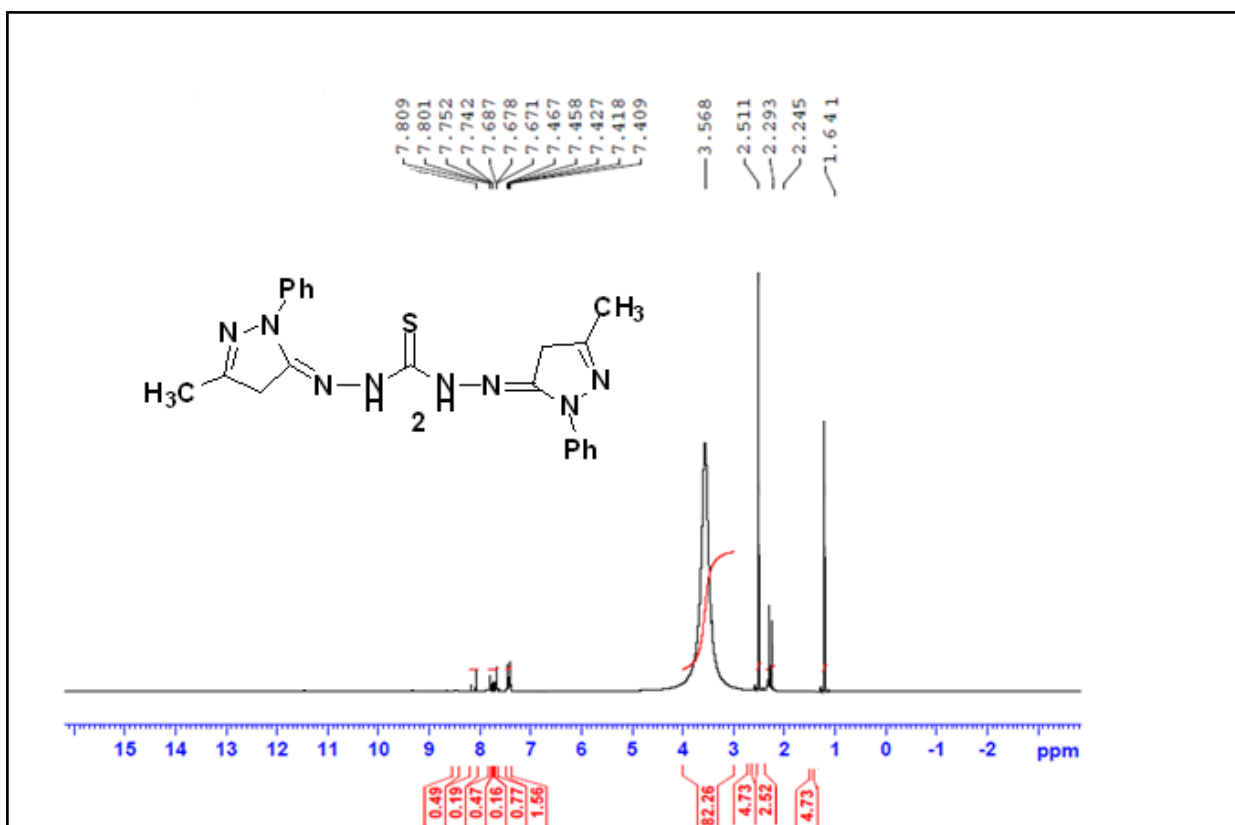

Figure S4. <sup>1</sup>H NMR of compound (2).

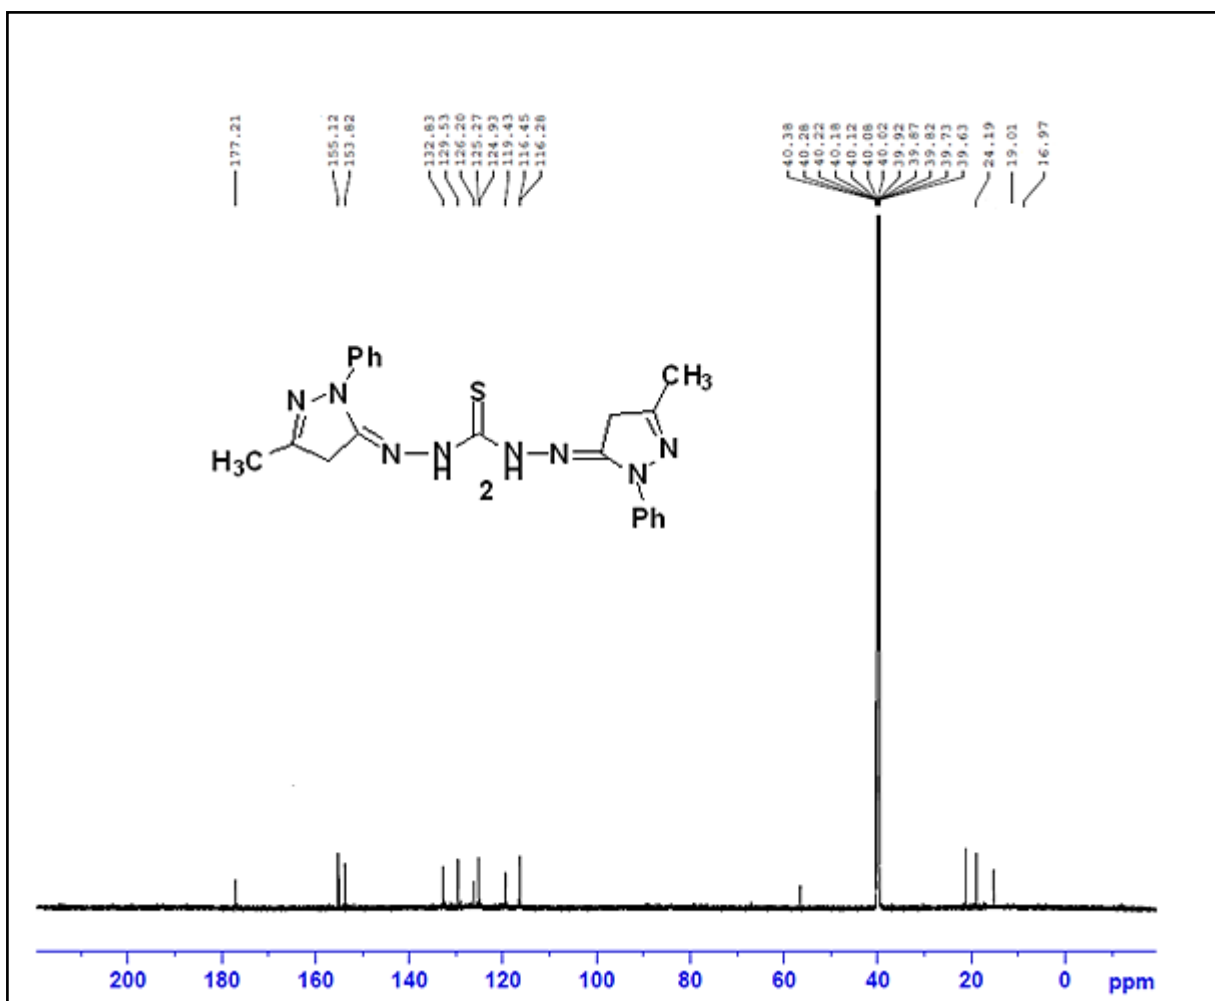

Figure S5.  $^{13}\text{C}$  NMR of compound (2).

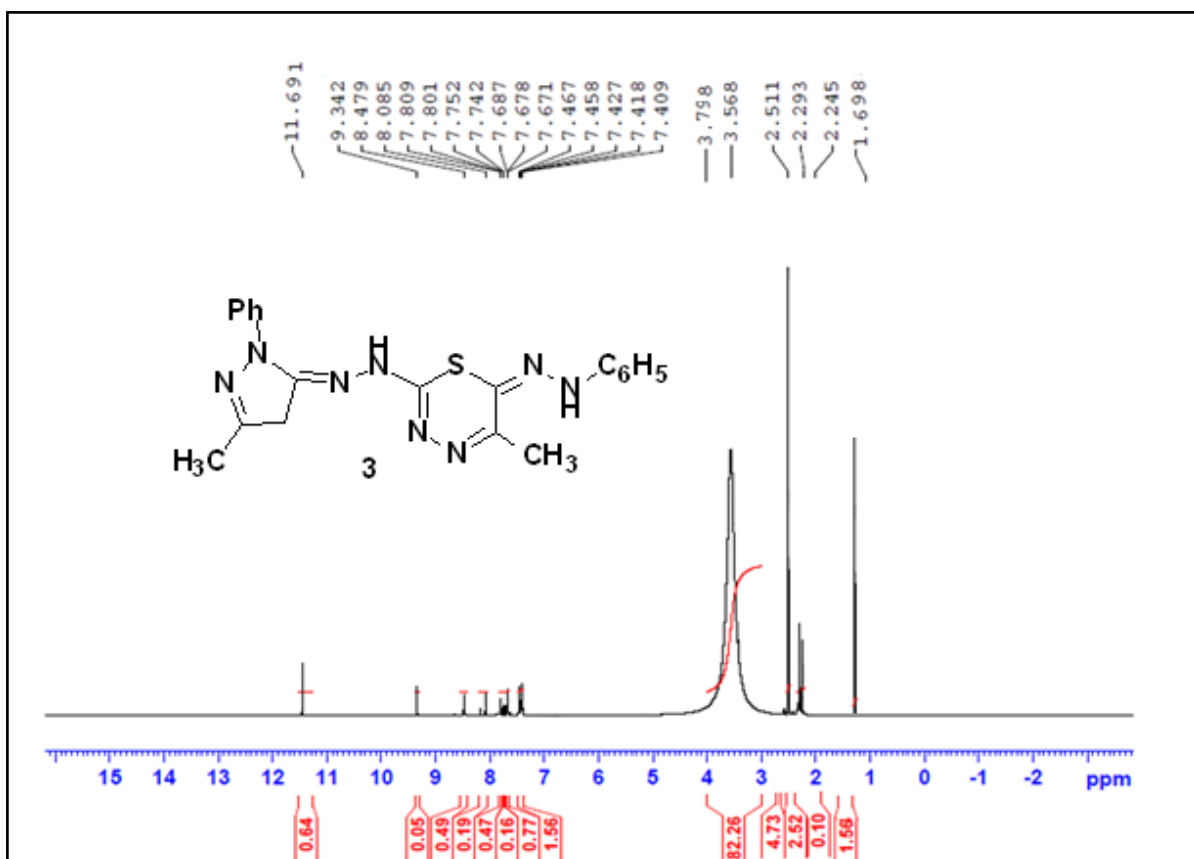

Figure S6. <sup>1</sup>H NMR of compound (3).

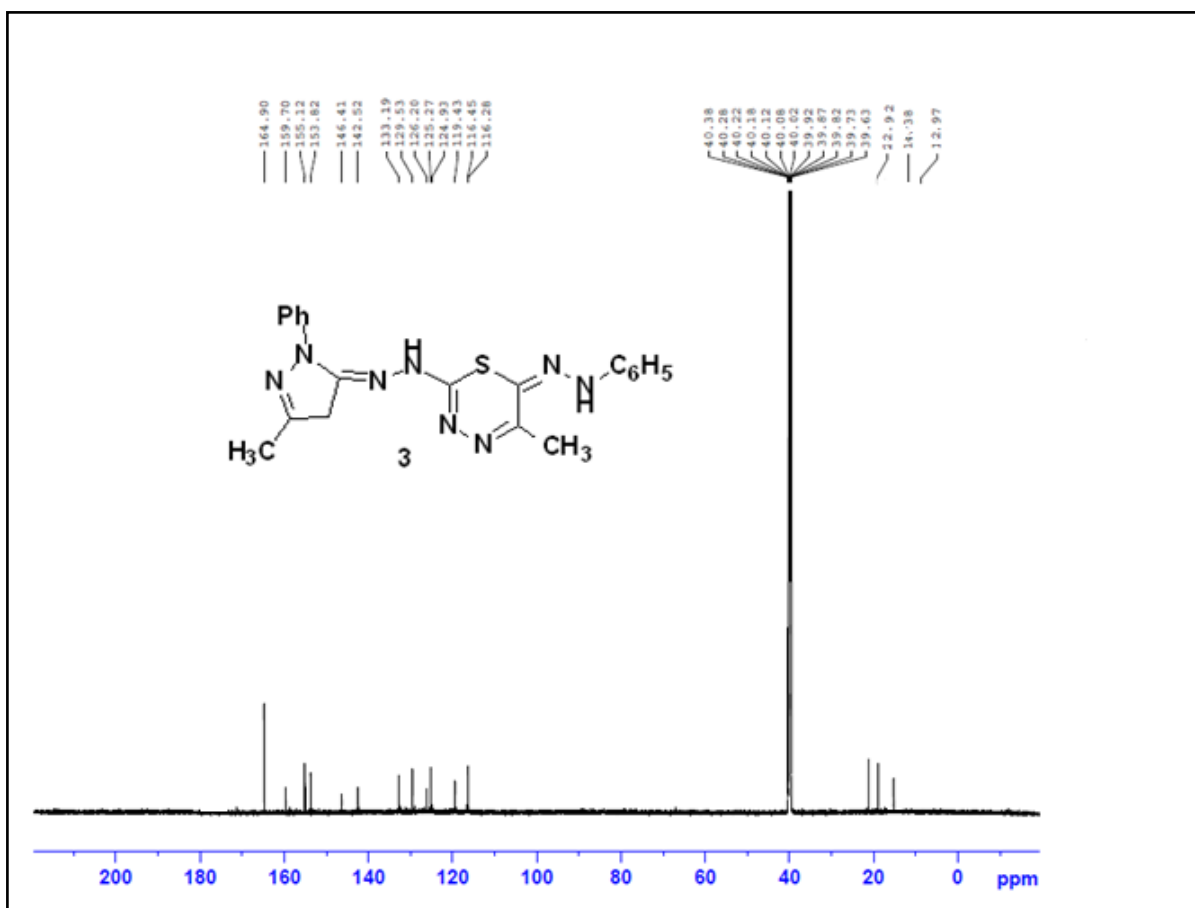

Figure S7. <sup>13</sup>C NMR of compound (3).

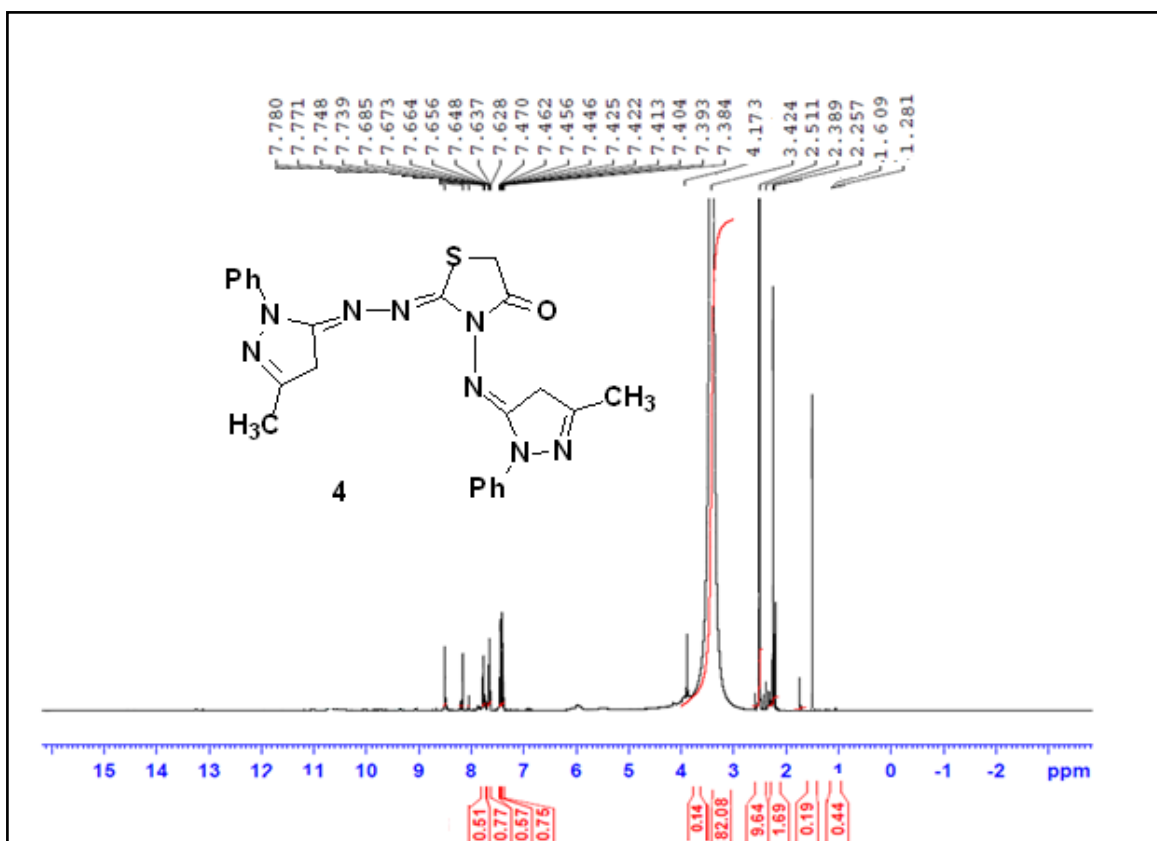

Figure S8. <sup>1</sup>H NMR of compound (4).

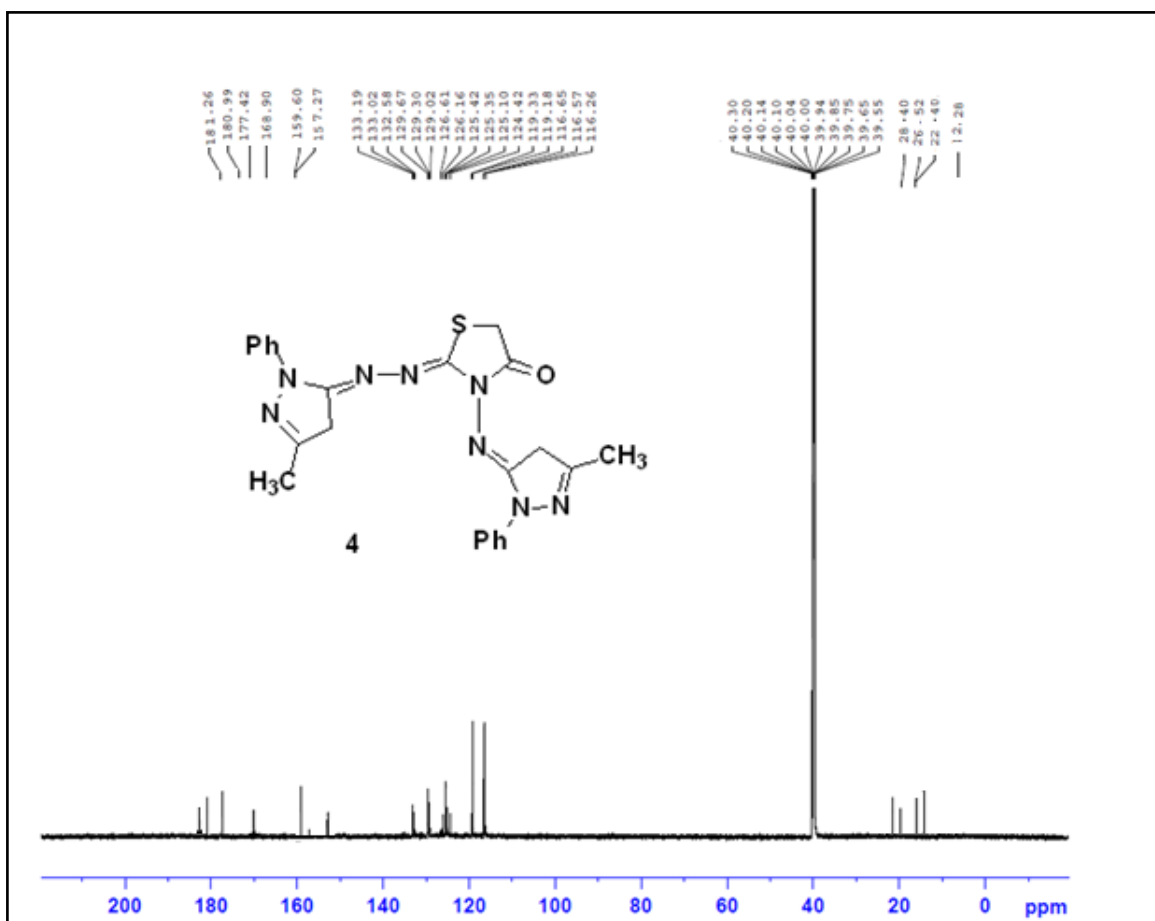

Figure S9. <sup>13</sup>C NMR of compound (4).

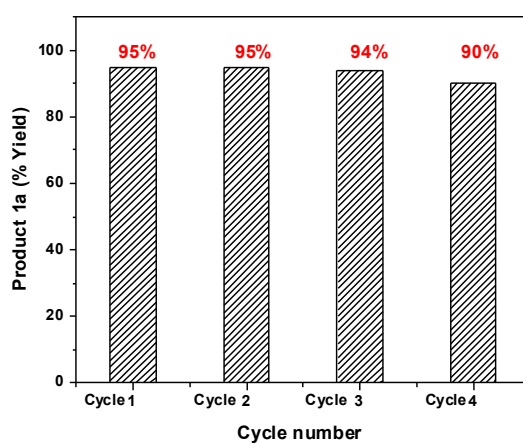

Figure S10. The reusability of the CS-DAA-MgO nanocomposite as a heterogeneous base catalyst (30 wt%) for one hour.



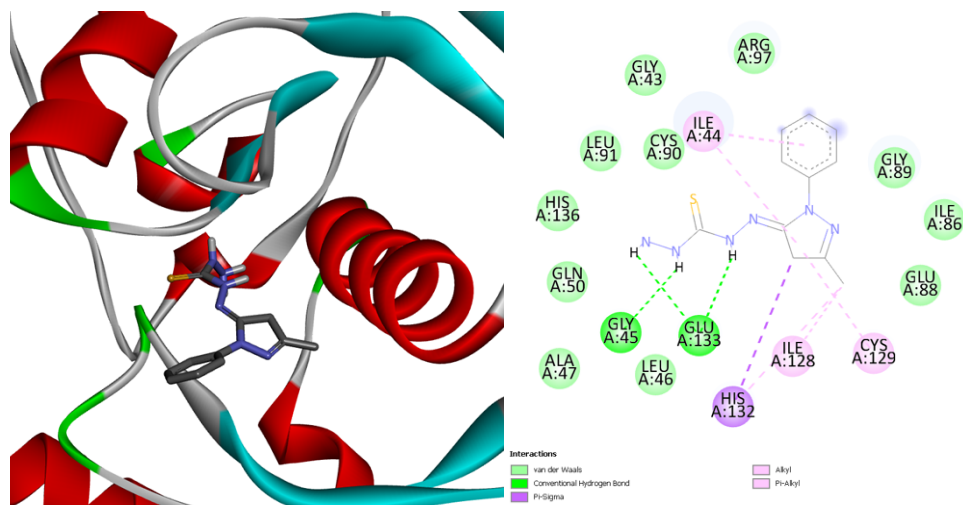

**Figure S11.** 3D(Left) and 2D (Right) of the binding interactions of compound (1) with the active site of *Escherichia coli*.

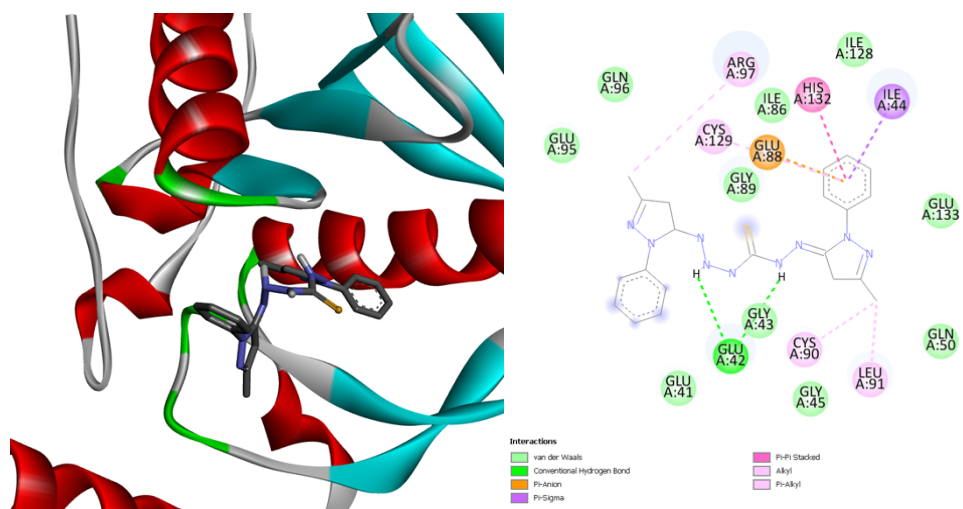

**Figure S12.** 3D(Left) and 2D (Right) of the binding interactions of compound (2) with the active site of *Escherichia coli*.

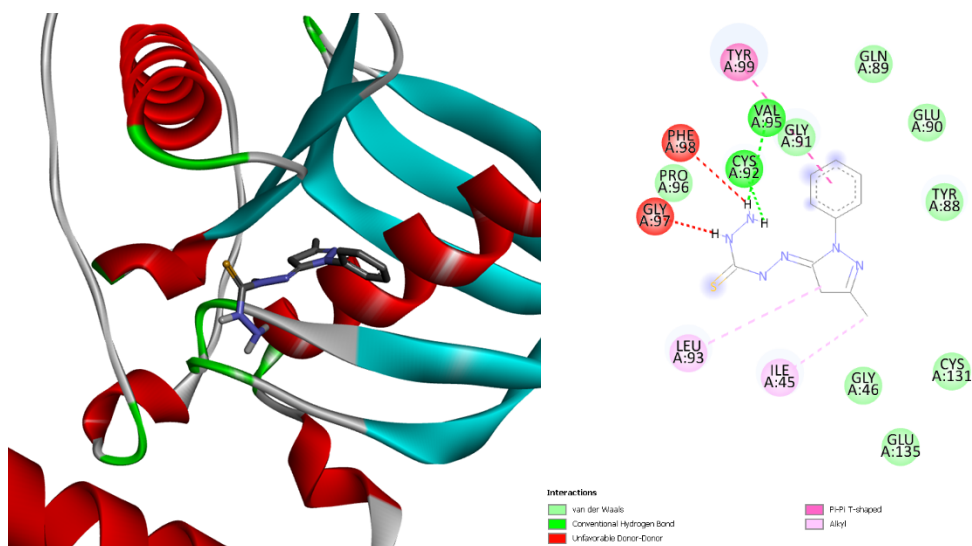

**Figure S13.** 3D(Left) and 2D (Right) of the binding interactions of compound (1) with the active site of *Pseudomonas aeruginosa*.

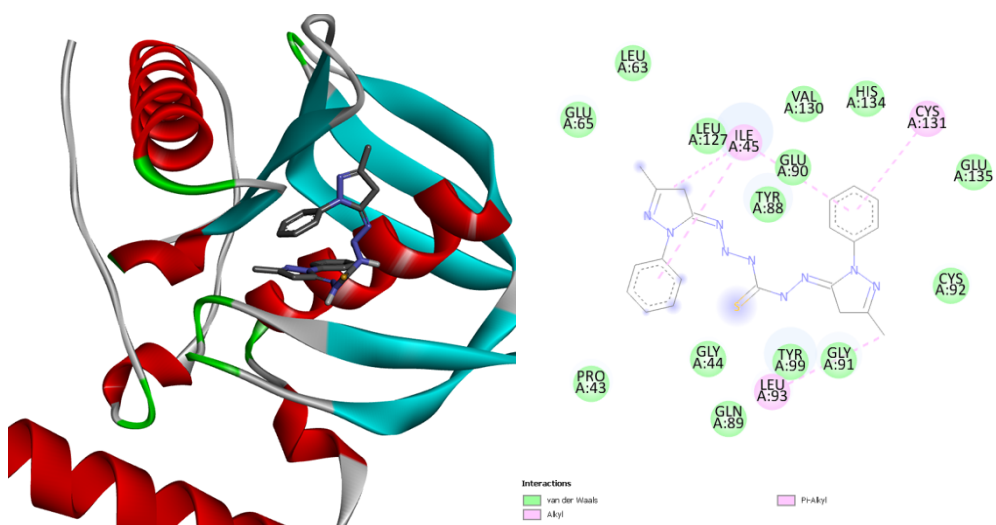

**Figure S14.** 3D(Left) and 2D (Right) of the binding interactions of compound (2) with the active site of *Pseudomonas aeruginosa*.

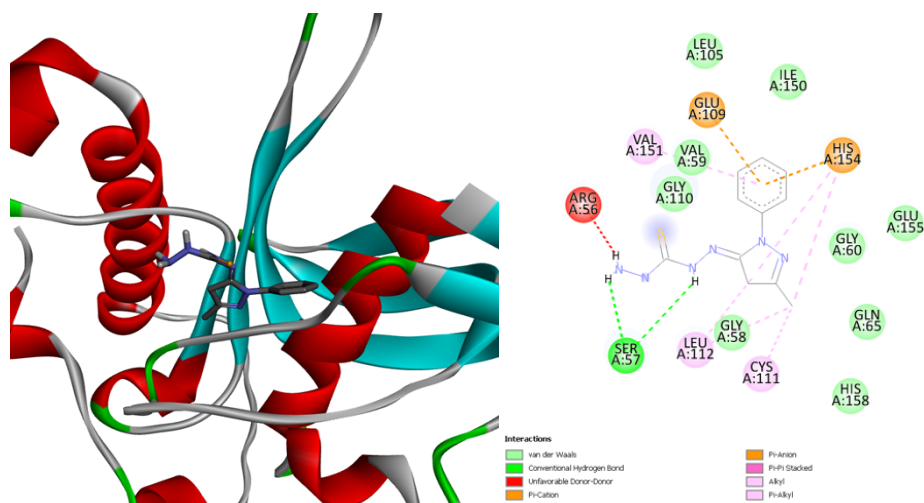

**Figure S15.** 3D(Left) and 2D (Right) of the binding interactions of compound (1) with the active site of *Staphylococcus aureus*.

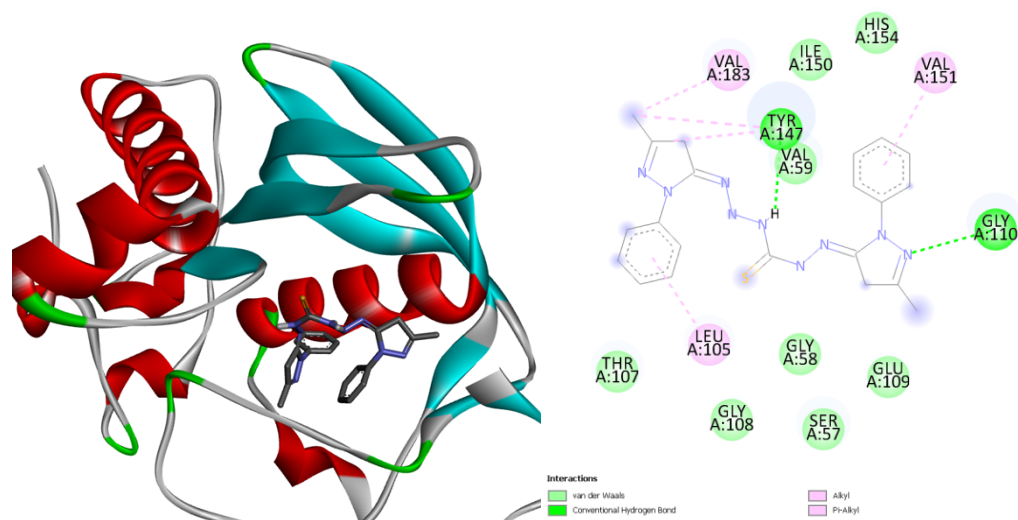

**Figure S16.** 3D(Left) and 2D (Right) of the binding interactions of compound (2) with the active site of *Staphylococcus aureus*.

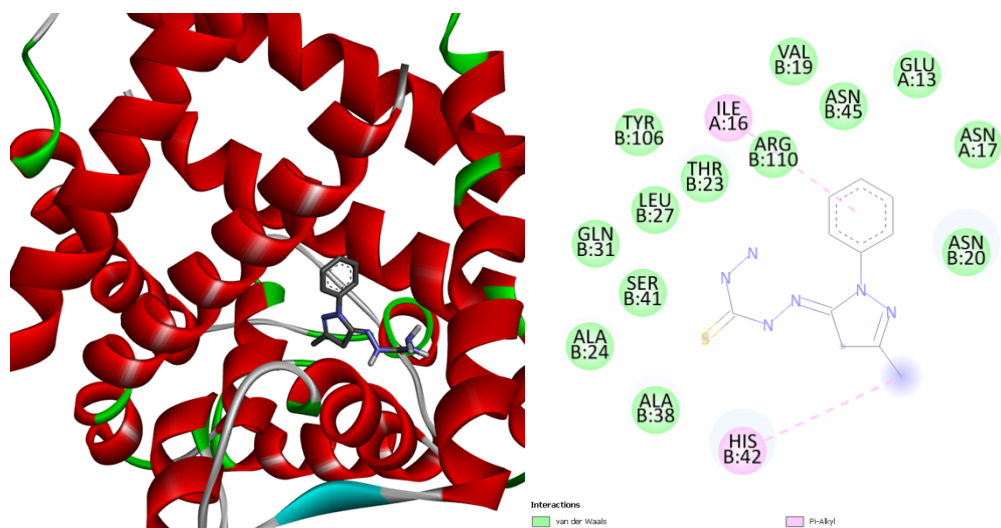

**Figure S17.** 3D(Left) and 2D (Right) of the binding interactions of compound (1) with the active site of *Staphylococcus epidermidis*.

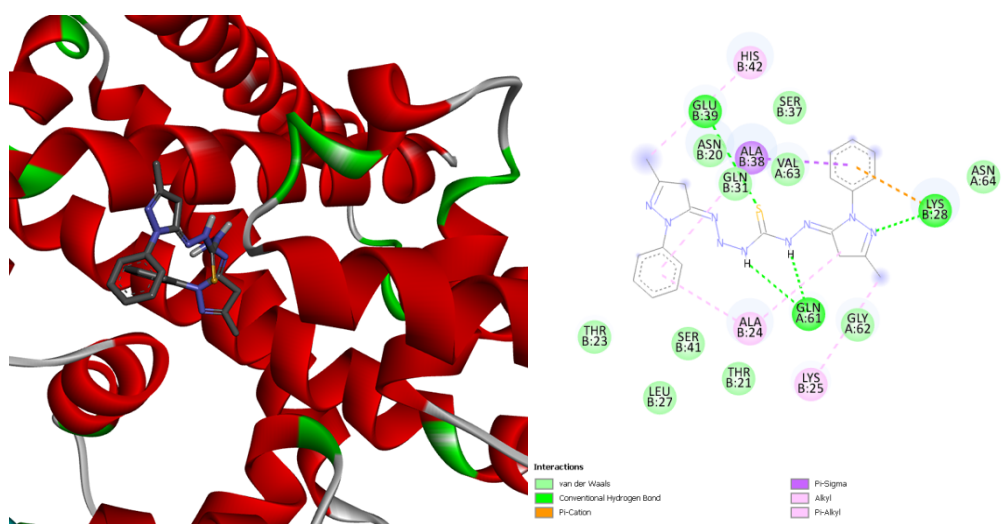

**Figure S18.** 3D(Left) and 2D (Right) of the binding interactions of compound (2) with the active site of *Staphylococcus epidermidis*.
